# Supplementary material for: Identification and experimental validation of biomarkers associated with integrative stress response in chronic rhinosinusitis with nasal polyps
Source: Research Square preprint supplement (doi:10.21203/rs.3.rs-8127671/v1), 2025-12-08
Supplement: Supplementary file 1 [file 44da255127d42fe34e0f4af1.xlsx]

## Sheet: Sheet1
	temperature	time
Pre-denaturation	95℃	1 min
denaturation	95℃	20 s
anneal	55℃	20 s
extend	72℃	30 s
