# Supplementary material for: Identification and experimental validation of biomarkers associated with integrative stress response in chronic rhinosinusitis with nasal polyps
Source: Research Square preprint supplement (doi:10.21203/rs.3.rs-8127671/v1), 2025-12-08
Supplement: Supplementary file 2 [file 5eb3ff087805d6f984ac9223.xlsx]

## Sheet: Sheet1
ISR-RGs
AAAS
ATM
ATR
BAG1
BAG2
BAG3
BAG4
BAG5
CCAR2
COL4A6
CRYAB
DEDD2
DNAJB1
DNAJB6
DNAJC2
DNAJC7
FKBP4
GADD45B
GSK3B
HSF1
HSP90AA1
HSP90AB1
HSPA12A
HSPA12B
HSPA13
HSPA14
HSPA1A
HSPA1B
HSPA1L
HSPA2
HSPA4
HSPA4L
HSPA6
HSPA8
HSPA9
HSPB1
HSPB2
HSPH1
MAPK1
MAPK3
MAPKAPK2
MRPL18
NDC1
NUP107
NUP133
NUP153
NUP155
NUP160
NUP188
NUP205
NUP210
NUP214
NUP35
NUP37
NUP43
NUP50
NUP54
NUP62
NUP85
NUP88
NUP93
NUP98
POM121
POM121C
RAE1
RANBP2
RLN1
RPA1
RPA2
RPA3
RPS19BP1
SEC13
SEH1L
SERPINH1
SIRT1
ST13
TNFRSF21
TPR
YWHAE
ABCC3
ABCC4
AGER
ALDH3A1
BLVRB
CBR1
CBR3
CES1
CES2
CES3
CES4A
EGR1
EPHA2
EPHA3
FGF13
G6PD
GCLC
GCLM
GGT1
GPX2
GPX3
GSR
GSTA1
GSTA4
GSTM2
GSTM3
GSTM4
GSTM5
GSTP1
HBEGF
HGF
HMOX1
KEAP1
MAFF
MAFG
ME1
MGST2
MGST3
NFE2L2
NQO1
NRG1
PDGFB
PGD
PPARD
PRDX1
PRDX6
PTGR1
RXRA
SERPINA1
SOD3
SQSTM1
TGFA
TGFB1
TGFB2
TGFBR2
TXN
TXNRD1
TXNRD3
AMFR
ATF3
ATF4
ATF6
ATF6B
CCND1
CDK5RAP3
CREB3
CREB3L1
CREB3L2
CREB3L4
CREBZF
CTH
DDIT3
DERL1
DERL2
DERL3
DNAJC10
EIF2AK2
EIF2AK3
EIF2S1
ERLEC1
ERMP1
ERN1
HERPUD1
HERPUD2
HSPA5
MBTPS1
MBTPS2
OS9
PARP16
PPP1R15A
PTPN1
QRICH1
RHBDD2
SERP1
SERP2
STC2
STUB1
TBL2
TMED2
TMTC4
VAPB
VCP
WFS1
XBP1
YOD1
ACAA2
ADAM8
ADO
AK4
ANGPT4
AQP1
AQP3
ATF2
ATP7A
BAD
BCL2
BMP7
BNIP3
BNIP3L
BRIP1
CARD16
CASR
CBS
CCNA2
CDKN1B
CFLAR
CITED2
CLCA1
CPEB1
CPEB2
CYBB
DDR2
DNMT3A
E2F1
EDN1
EGLN1
EGLN2
EGLN3
ENDOG
EPAS1
ERO1A
FABP1
FAM162A
FMN2
FOS
GATA6
GNGT1
HIF1A
HIF1AN
HILPDA
HIPK2
HP1BP3
HYOU1
IRAK1
JUND
KCND2
KCNK2
KCNK3
KCNMB1
LMNA
MDM2
MDM4
MGARP
MIEF1
MLST8
MPL
MT3
MTOR
MYC
NDNF
NDRG1
NKX3-1
NOP53
NOTCH1
NPEPPS
OPRD1
P4HB
PDK1
PDK3
PGK1
PHB2
PINK1
PLK3
PMAIP1
PPARG
PRKAA1
PRKCE
PTGIS
PTGS2
RBPJ
RGCC
RORA
RPTOR
SCN2A
SDHD
SDIM1
SFRP1
SIRT2
SIRT4
SLC29A1
SLC2A4
SLC8A1
SLC8A3
SLC9A1
SRC
STC1
STOX1
SUV39H1
SUV39H2
TERT
TIGAR
TP53
TREM2
TWIST1
UBQLN1
UCN3
VASN
VEGFA
VHL
ZFP36L1
AATF
ABL1
ACER2
ALKBH7
ALKBH8
APBB1
APC
APLF
ARMT1
ASH2L
ATMIN
BABAM2
BARD1
BATF
BAZ1B
BCL3
BCL6
BLM
BOD1L1
BRAT1
BRCA1
BRD4
BRSK1
BTG2
CASP2
CASP3
CASP9
CBL
CBX1
CBX3
CBX5
CCDC13
CCNK
CDK3
CDKN1A
CDKN2AIP
CENPS
CFAP410
CGAS
CHCHD6
CHD1L
CHD2
CHEK1
CHEK2
CIB1
CRADD
CTC1
CTLA4
CUL4A
CUL4B
DCUN1D5
DDB1
DDB2
DDX11
DTL
DTX3L
DYRK2
ERCC8
ETAA1
FAAP20
FAM111A
FANCF
FANCG
FANCL
FBH1
FBXO31
FBXO45
FLYWCH1
FOXO1
FOXP1
GNL1
H2AX
HELB
HERC2
HMCES
HPF1
HROB
HUS1
IKBKG
IMMP2L
INIP
INTS3
IRF3
IRF7
KAT5
KIN
LYN
MACROD1
MACROD2
MAPK15
MASTL
MCM10
MCM7
MCM8
MCM9
MCTS1
MEN1
METTL3
MICA
MMS19
MNDA
MORC2
MRE11
MRNIP
MTREX
NABP1
NABP2
NAE1
NCOA6
NEK4
NFAT5
NFATC2
NIPBL
NPAS2
NRDE2
NUAK1
NUPR2
OARD1
OGG1
OTUB1
PAK1
PARP1
PARP4
PAXX
PCLAF
PHF1
PIDD1
PIERCE1
POLB
POLE3
POLK
POLQ
PPP4R3A
PPP4R3B
PPP4R3C
PRAP1
PRKDC
PSEN1
PSME4
RAD1
RAD17
RAD18
RAD50
RAD51
RAD51AP1
RAD9A
RBBP5
RBBP6
RBM24
RBX1
RFWD3
RIF1
RNF168
RNF169
RNF8
RPS3
SAMHD1
SETD1A
SETD7
SETX
SGK1
SHPRH
SIRT7
SLF1
SLF2
SLFN11
SMARCAL1
SMC5
SMC6
SPATA18
SPDYA
SPIDR
SPINDOC
SPRTN
STK11
STXBP4
SUSD6
TAF1
TAF9
TANK
TAOK1
TAOK2
TAOK3
TFDP3
TIMELESS
TLK1
TLK2
TOP2A
TOPBP1
TOPORS
TP53BP1
TP73
TRAF6
TRAIP
TRIP12
TTC5
UBA1
UBA7
UBE2B
UBE2E2
UBE2T
UBQLN4
UBR5
UFL1
USP10
USP16
USP28
USP47
VAV3
VCPIP1
VRK1
WAC
WDR4
WDR48
WDR76
WRN
XIAP
XRCC3
XRCC5
YAP1
YY1
ZBTB1
ZBTB38
ZBTB4
ZBTB40
ZC3H12A
ZDHHC16
ZMAT3
ZNF385A
ZRANB3
