# Supplementary material for: Identification and experimental validation of biomarkers associated with integrative stress response in chronic rhinosinusitis with nasal polyps
Source: Research Square preprint supplement (doi:10.21203/rs.3.rs-8127671/v1), 2025-12-08
Supplement: Supplementary file 3 [file 70af2a43e72d102785d0f3c7.xlsx]

## Sheet: Sheet1
Number	Group	Concentration	A260/A280	A260/A230
		(ng/uL)
1	Control	1945.7	1.966	2.127
2	Control	652.76	1.934	2.221
3	Control	2154.2	1.983	2.253
4	Control	1262.6	1.971	2.251
5	Control	719.48	1.909	2.131
6	Control	1579.2	1.991	2.138
7	Control	640.72	1.999	2.031
8	Control	843.8	1.926	2.179
9	Control	645.28	1.996	2.139
10	Control	411	1.921	1.099
11	CRSwNP	781.76	1.751	0.869
12	CRSwNP	2042.5	1.986	2.075
13	CRSwNP	632.48	1.916	2.134
14	CRSwNP	621.52	1.971	1.841
15	CRSwNP	796.68	1.929	1.56
16	CRSwNP	2512	1.976	2.103
17	CRSwNP	419.8	1.982	1.458
18	CRSwNP	2292.8	1.638	1.408
19	CRSwNP	551.24	1.93	1.306
20	CRSwNP	1343.4	1.958	2.008
