# Supplementary material for: Identification and experimental validation of biomarkers associated with integrative stress response in chronic rhinosinusitis with nasal polyps
Source: Research Square preprint supplement (doi:10.21203/rs.3.rs-8127671/v1), 2025-12-08
Supplement: Supplementary file 4 [file 763e126fa4e119659a801c37.xlsx]

## Sheet: Sheet1
Primer	Sequences
EGLN3 F	GCTCGTGTAGATCGTTCCCTC
EGLN3 R	CAGGAAGTTGTCCAGGTAGCAG
HMOX1 F	GGGAATTCTCTTGGCTGGCT
HMOX1 R	GCTGCCACATTAGGGTGTCT
CYBB F	TGTCAAGTGCCCAAAGGTGT
CYBB R	CCCAACGATGCGGATATGGA
TGFB1 F	CCCCTACATTTGGAGCCTGG
TGFB1 R	CACGTAGTACACGATGGGCA
GAPDH F	ATGGGCAGCCGTTAGGAAAG
GAPDH R	AGGAAAAGCATCACCCGGAG
